# Supplementary material for: Association between rs2431697 T allele on 5q33.3 and systemic lupus erythematosus: case-control study and meta-analysis
Source: PubMed Central journal article supplement (PMC4624827; doi:10.1007/s10067-015-3045-4), 2015-08-07
Supplement: 10067_2015_3045_MOESM2_ESM.pdf [file 10067_2015_3045_MOESM2_ESM.pdf]

**a**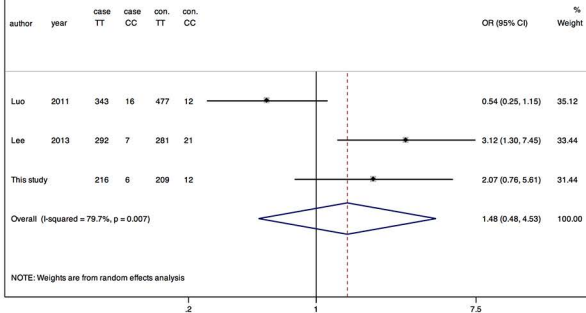**b**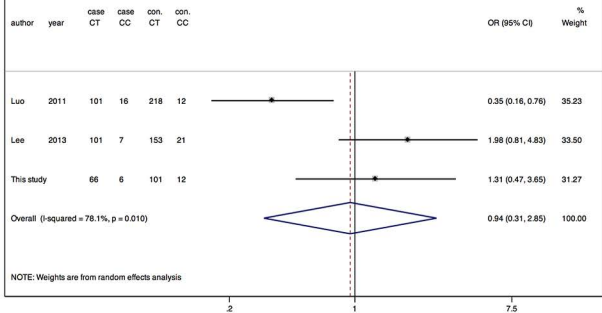**c**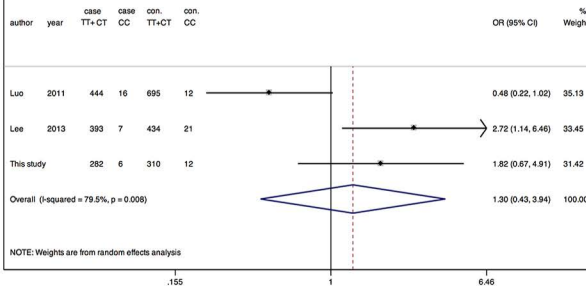**d**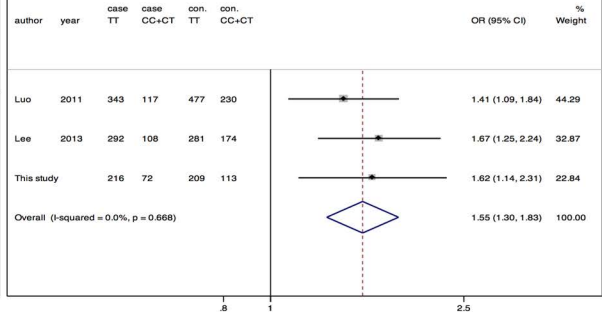

**Online Resource 2** Forest plot of association between rs2431697 and SLE risk under genotypic model in the women data-based meta-analysis a: TT vs CC b: CT vs CC c: TT+CT vs CC d: TT vs CC+CT

Title: Association between rs2431697 T allele on 5q33.3 and systemic lupus erythematosus: case-control study and meta-analysis

Journal name: Clinical Rheumatology

Author: Zhao-Ming Tang

Affiliation: Department of Laboratory Medicine, Union Hospital, Tongji Medical College, Huazhong University of Science and Technology, Wuhan, China

Author: Ping Wang

Affiliation: Department of Laboratory Medicine, Union Hospital, Tongji Medical College, Huazhong University of Science and Technology, Wuhan, China

Author: Pan-Pan Chang

Affiliation: Central Laboratory, Union Hospital, Tongji Medical College, Huazhong University of Science and Technology, Wuhan, China

Author: Tony Hasahya

Affiliation: Department of Cardiology, Union Hospital, Tongji Medical College, Huazhong University of Science and Technology, Wuhan, China

Author: Hui Xing

Affiliation: Department of Laboratory Medicine, Union Hospital, Tongji Medical College, Huazhong University of Science and Technology, Wuhan, China

Author: Jin-Ping Wang

Affiliation: Department of Rheumatology, Union Hospital, Tongji Medical College, Huazhong University of Science and Technology, Wuhan, China

Author: Li-Hua Hu (Corresponding author)

Affiliation: Department of Laboratory Medicine, Union Hospital, Tongji Medical College, Huazhong University of Science and Technology, Wuhan, China

Email: [toumin@126.com](mailto:toumin@126.com)
